# Supplementary material
Source: PubMed Central journal article supplement (PMC10291629)
Supplement: NIHMS1883819-supplement-supplementary_information.pdf [file NIHMS1883819-supplement-supplementary_information.pdf]

## Supplemental tables for

### Transcriptional and mutational signatures of the *Drosophila* ageing germline

Evan Witt, Christopher B Langer, Nicolas Svetec, Li Zhao\*

Laboratory of Evolutionary Genetics and Genomics, The Rockefeller University, New York, NY 10065, USA

\*Correspondence to: [lzhao@rockefeller.edu](mailto:lzhao@rockefeller.edu)

| Replicate | Number of cells | Average UMIs detected per cell | ScRNA-seq number of mapped reads | gDNA number of mapped reads | gDNA coverage |
|-----------|-----------------|--------------------------------|----------------------------------|-----------------------------|---------------|
| Old1      | 10558           | 10659.74                       | 410919834                        | 100179710                   | 104.553       |
| Old2      | 14289           | 4241.488                       | 140702200                        | 41647804                    | 43.4658       |
| Old3      | 4014            | 6692.628                       | 142874684                        | 53553546                    | 55.8913       |
| Young1    | 4000            | 9958.403                       | 138231341                        | 102792328                   | 107.279       |
| Young2    | 10000           | 13011.76                       | 276598073                        | 101604985                   | 106.04        |
| Young3    | 9489            | 13014.51                       | 327810578                        | 41436733                    | 43.2455       |

**Supplemental table 1: Summary statistics of each replicate and corresponding gDNA file.**

| Gene        | Fbgn name   | P value   | Log <sub>2</sub> fold change | Bonferroni-adjusted P | Cell type                | Enriched in age |
|-------------|-------------|-----------|------------------------------|-----------------------|--------------------------|-----------------|
| RplI215     | FBgn0003277 | 4.12E-09  | 0.3973355                    | 6.33E-05              | gsc, early spermatogonia | Young           |
| RplI18      | FBgn0003275 | 8.75E-71  | 0.61734681                   | 1.34E-66              | early spermatids         | Young           |
| RplI18      | FBgn0003275 | 3.71E-107 | 0.4150375                    | 5.70E-103             | early spermatocytes      | Young           |
| RplI18      | FBgn0003275 | 5.65E-29  | 0.82130144                   | 8.67E-25              | gsc, early spermatogonia | Young           |
| RplI18      | FBgn0003275 | 2.57E-12  | 0.76464915                   | 3.95E-08              | late spermatids          | Young           |
| RplI18      | FBgn0003275 | 2.56E-179 | 0.4866866                    | 3.94E-175             | late spermatocytes       | Young           |
| RplI18      | FBgn0003275 | 3.36E-114 | 0.44202857                   | 5.15E-110             | late spermatogonia       | Young           |
| RplI15      | FBgn0004855 | 3.79E-33  | 0.80140188                   | 5.83E-29              | gsc, early spermatogonia | Young           |
| Rpb8        | FBgn0037121 | 1.68E-41  | 1.0299795                    | 2.58E-37              | gsc, early spermatogonia | Young           |
| Rpb8        | FBgn0037121 | 2.79E-140 | 0.49454147                   | 4.29E-136             | late spermatogonia       | Young           |
| Rpb5        | FBgn0033571 | 3.75E-22  | 0.675871                     | 5.76E-18              | gsc, early spermatogonia | Young           |
| Mes4        | FBgn0034726 | 3.21E-08  | 0.27180462                   | 0.00049248            | gsc, early spermatogonia | Young           |
| DNApol-iota | FBgn0037554 | 9.08E-08  | 0.25715784                   | 0.00139522            | gsc, early spermatogonia | Young           |
| Tctp        | FBgn0037874 | 1.82E-16  | -0.254537                    | 2.80E-12              | late spermatogonia       | Old             |

|                      |             |           |            |            |                          |     |
|----------------------|-------------|-----------|------------|------------|--------------------------|-----|
| <b>RpS3</b>          | FBgn0002622 | 1.11E-07  | -0.2738453 | 0.00171142 | early spermatocytes      | Old |
| <b>RpS3</b>          | FBgn0002622 | 1.02E-33  | -0.400618  | 1.56E-29   | late spermatogonia       | Old |
| <b>Rad23</b>         | FBgn0026777 | 6.71E-09  | -0.2740551 | 0.000103   | early spermatocytes      | Old |
| <b>Rad23</b>         | FBgn0026777 | 1.30E-06  | -0.3137124 | 0.02001701 | gsc, early spermatogonia | Old |
| <b>Pop2</b>          | FBgn0036239 | 3.95E-17  | -0.4439238 | 6.07E-13   | early spermatids         | Old |
| <b>Polr2I</b>        | FBgn0004855 | 4.11E-37  | -0.9381206 | 6.31E-33   | gsc, early spermatogonia | Old |
| <b>Polr2I</b>        | FBgn0004855 | 4.64E-41  | -0.2622246 | 7.12E-37   | late spermatogonia       | Old |
| <b>Polr2H</b>        | FBgn0037121 | 3.63E-15  | -0.3432375 | 5.58E-11   | early spermatocytes      | Old |
| <b>Polr2H</b>        | FBgn0037121 | 1.04E-46  | -1.27946   | 1.60E-42   | gsc, early spermatogonia | Old |
| <b>Polr2H</b>        | FBgn0037121 | 5.90E-33  | -0.3419196 | 9.06E-29   | late spermatocytes       | Old |
| <b>Polr2H</b>        | FBgn0037121 | 1.55E-88  | -0.5176787 | 2.37E-84   | late spermatogonia       | Old |
| <b>Polr2F</b>        | FBgn0003275 | 8.72E-30  | -0.5970404 | 1.34E-25   | early spermatocytes      | Old |
| <b>Polr2F</b>        | FBgn0003275 | 5.58E-51  | -1.3372644 | 8.56E-47   | gsc, early spermatogonia | Old |
| <b>Polr2F</b>        | FBgn0003275 | 9.39E-29  | -1.2519184 | 1.44E-24   | late spermatids          | Old |
| <b>Polr2F</b>        | FBgn0003275 | 8.57E-121 | -0.9244289 | 1.32E-116  | late spermatocytes       | Old |
| <b>Polr2F</b>        | FBgn0003275 | 1.55E-130 | -0.6554289 | 2.38E-126  | late spermatogonia       | Old |
| <b>Polr2F</b>        | FBgn0003275 | 0         | -1.2930938 | 0          | early spermatids         | Old |
| <b>Polr2E</b>        | FBgn0033571 | 1.67E-34  | -0.9207733 | 2.56E-30   | gsc, early spermatogonia | Old |
| <b>Polr2A</b>        | FBgn0003277 | 1.46E-19  | -0.6032016 | 2.24E-15   | gsc, early spermatogonia | Old |
| <b>PolD3</b>         | FBgn0283467 | 1.63E-13  | -0.3674564 | 2.51E-09   | gsc, early spermatogonia | Old |
| <b>CycG</b>          | FBgn0039858 | 4.03E-46  | -0.4248538 | 6.20E-42   | early spermatids         | Old |
| <b>CG32756</b>       | FBgn0052756 | 3.52E-08  | -0.3531289 | 0.00054089 | gsc, early spermatogonia | Old |
| <b>Caf1-55</b>       | FBgn0263979 | 2.79E-10  | -0.4207472 | 4.29E-06   | gsc, early spermatogonia | Old |
| <b>14-3-3epsilon</b> | FBgn0020238 | 2.41E-07  | -0.2607687 | 0.00370001 | early spermatocytes      | Old |
| <b>14-3-3epsilon</b> | FBgn0020238 | 2.29E-10  | -0.5121799 | 3.51E-06   | gsc, early spermatogonia | Old |
| <b>14-3-3epsilon</b> | FBgn0020238 | 1.76E-27  | -0.3352841 | 2.71E-23   | late spermatogonia       | Old |

**Supplemental Table 2: Table of differentially expressed genome maintenance genes.** These were calculated by splitting the main Seurat object into each cell type and setting the Idents to “age”. Raw P values are from a two-sided Wilcoxon test.

| Gene                                    | P value   | Log <sub>2</sub> fold change | Bonferroni-adjusted P | Enriched in fly age | Cell type                | Gene class  |
|-----------------------------------------|-----------|------------------------------|-----------------------|---------------------|--------------------------|-------------|
| <b>dmel-testis-AG-merged.15917</b>      | 3.38E-49  | 0.29428559                   | 5.33E-45              | Young               | Early spermatids         | segregating |
| <b>dmel-testis-AG-mergedplus.2408</b>   | 5.55E-20  | 0.29227805                   | 8.75E-16              | Young               | Early spermatocytes      | segregating |
| <b>dmel-testis-AG-mergedminus.14760</b> | 3.92E-09  | 0.3235566                    | 6.18E-05              | Young               | Late spermatogonia       | segregating |
| <b>dmel-testis-AG-merged.15917</b>      | 1.70E-16  | 0.26208888                   | 2.67E-12              | Old                 | Late spermatids          | segregating |
| <b>dmel-testis-AG-mergedplus.3086</b>   | 6.28E-195 | 1.28564792                   | 9.90E-191             | Old                 | Early spermatids         | fixed       |
| <b>dmel-testis-AG-merged.15917</b>      | 1.17E-40  | 0.33935426                   | 1.84E-36              | Old                 | Early spermatids         | fixed       |
| <b>CG43760</b>                          | 8.56E-87  | 0.5905714                    | 1.35E-82              | Young               | Early spermatids         | fixed       |
| <b>CG43750</b>                          | 3.19E-46  | 0.25678987                   | 5.02E-42              | Young               | Early spermatids         | fixed       |
| <b>CG43449</b>                          | 3.44E-41  | 0.2949748                    | 5.42E-37              | Young               | Early spermatids         | fixed       |
| <b>CG44174</b>                          | 2.47E-149 | 1.19382429                   | 3.89E-145             | Old                 | Early spermatocytes      | fixed       |
| <b>CG44227</b>                          | 2.61E-27  | 0.29089427                   | 4.12E-23              | Old                 | Early spermatocytes      | fixed       |
| <b>CG43760</b>                          | 1.16E-10  | 0.26595429                   | 1.83E-06              | Young               | Early spermatocytes      | fixed       |
| <b>CG43750</b>                          | 8.31E-154 | 0.93040937                   | 1.31E-149             | Old                 | Cyst cells               | fixed       |
| <b>CG43449</b>                          | 3.10E-91  | 0.74957663                   | 4.89E-87              | Old                 | Cyst cells               | fixed       |
| <b>CG43760</b>                          | 5.47E-47  | 0.96654881                   | 8.62E-43              | Old                 | Late spermatocytes       | fixed       |
| <b>CG43750</b>                          | 1.01E-24  | 0.94625088                   | 1.59E-20              | Old                 | Epithelial cells         | fixed       |
| <b>CG43760</b>                          | 1.27E-08  | 0.4154728                    | 0.00019959            | Old                 | Epithelial cells         | fixed       |
| <b>CG43760</b>                          | 5.91E-70  | 1.07260707                   | 9.31E-66              | Old                 | Hub cells                | fixed       |
| <b>CG43750</b>                          | 1.78E-25  | 0.44217757                   | 2.81E-21              | Old                 | Hub cells                | fixed       |
| <b>CG43760</b>                          | 1.26E-48  | 0.99877606                   | 1.98E-44              | Old                 | Late spermatogonia       | fixed       |
| <b>dmel-testis-AG-merged.2415</b>       | 4.16E-17  | 0.44607375                   | 6.55E-13              | Old                 | Late spermatogonia       | fixed       |
| <b>CG43760</b>                          | 5.80E-42  | 1.28883889                   | 9.15E-38              | Old                 | Late spermatids          | fixed       |
| <b>CG44329</b>                          | 1.08E-15  | 0.29891384                   | 1.71E-11              | Old                 | Late spermatids          | fixed       |
| <b>CG43760</b>                          | 6.07E-27  | 1.9003241                    | 9.56E-23              | Young               | Late spermatids          | fixed       |
| <b>dmel-testis-AG-merged.7007</b>       | 1.94E-11  | 0.91881875                   | 3.06E-07              | Young               | GSC, Early spermatogonia | fixed       |

**Supplemental Table 3: Differentially expressed *de novo* genes.** Unannotated *de novo* transcripts contain the string “dmel-testis-AG-merged” and correspond to entries in our custom reference gtf file using *de novo* transcripts published in our previous work (Witt et al., 2019). Raw P values are from a two-sided Wilcoxon test.

| Name           | P value  | Log <sub>2</sub> fold change | Bonferroni-adjusted P | Enriched in fly age | Cell type           |
|----------------|----------|------------------------------|-----------------------|---------------------|---------------------|
| <b>DM412</b>   | 4.45E-17 | 0.28765355                   | 7.02E-13              | Old                 | Early spermatids    |
| <b>Jockey2</b> | 5.23E-28 | 0.40396657                   | 8.25E-24              | Old                 | Early spermatocytes |
| <b>Jockey2</b> | 2.63E-37 | 0.60405864                   | 4.15E-33              | Young               | Early spermatocytes |
| <b>BS2</b>     | 4.30E-20 | 1.04723415                   | 6.78E-16              | Young               | Early spermatocytes |
| <b>DMRT1B</b>  | 1.61E-79 | 0.50192081                   | 2.53E-75              | Old                 | Cyst cells          |
| <b>DOC</b>     | 1.37E-62 | 0.26769752                   | 2.16E-58              | Old                 | Cyst cells          |

|                 |          |            |            |       |                          |
|-----------------|----------|------------|------------|-------|--------------------------|
| <b>Jockey2</b>  | 9.17E-62 | 0.26235339 | 1.45E-57   | Old   | Cyst cells               |
| <b>TAHRE</b>    | 3.06E-61 | 0.28940335 | 4.82E-57   | Old   | Cyst cells               |
| <b>DMRT1B</b>   | 4.01E-53 | 0.2895345  | 6.32E-49   | Old   | Cyst cells               |
| <b>HETA</b>     | 2.91E-52 | 0.34062078 | 4.59E-48   | Old   | Cyst cells               |
| <b>TRANSIB2</b> | 2.63E-36 | 0.87271865 | 4.14E-32   | Old   | Late spermatocytes       |
| <b>DOC</b>      | 3.39E-33 | 0.7125252  | 5.34E-29   | Old   | Late spermatocytes       |
| <b>DMRT1B</b>   | 2.44E-24 | 0.54239771 | 3.84E-20   | Old   | Late spermatocytes       |
| <b>Jockey2</b>  | 5.76E-11 | 0.29940896 | 9.07E-07   | Old   | Late spermatocytes       |
| <b>DM412</b>    | 1.74E-07 | 0.29024674 | 0.00273574 | Old   | Late spermatocytes       |
| <b>TAHRE</b>    | 2.69E-09 | 0.37897876 | 4.24E-05   | Old   | Epithelial cells         |
| <b>DOC</b>      | 6.17E-32 | 0.53975512 | 9.73E-28   | Old   | Hub cells                |
| <b>Jockey2</b>  | 1.91E-16 | 0.28563862 | 3.00E-12   | Old   | Hub cells                |
| <b>Jockey2</b>  | 5.22E-08 | 1.12125594 | 0.00082305 | Young | Late spermatogonia       |
| <b>DOC</b>      | 3.03E-07 | 1.88372443 | 0.00477686 | Young | Late spermatogonia       |
| <b>BS2</b>      | 7.18E-19 | 0.3484718  | 1.13E-14   | Old   | Late spermatids          |
| <b>DMRT1B</b>   | 4.46E-16 | 0.39895427 | 7.02E-12   | Old   | Late spermatids          |
| <b>DOC</b>      | 1.33E-13 | 0.42069063 | 2.09E-09   | Old   | Late spermatids          |
| <b>DM412</b>    | 1.53E-11 | 0.29732294 | 2.41E-07   | Old   | Late spermatids          |
| <b>Jockey2</b>  | 3.01E-10 | 0.56404339 | 4.74E-06   | Old   | GSC, Early spermatogonia |

**Supplemental Table 4: Table of differentially expressed transposable elements.** Raw P values are from a two-sided Wilcoxon test.
